# Supplementary material
Source: Research Square preprint supplement (doi:10.21203/rs.3.rs-9383588/v1)

## Supplementary Material

Supplementary Table S1. Individual metadata and clinical condition description of infected group guinea pigs (*Cavia porcellus*). Code (IP : Infected Peru; II : Infected Inti)

| N° | Code  | Breed | Sex    | Weight (g) | Euthanasia method |               |          | Clinical findings |                                  |
|----|-------|-------|--------|------------|-------------------|---------------|----------|-------------------|----------------------------------|
|    |       |       |        |            | Xylazine (mL)     | Ketamine (mL) | T61 (ml) | No. of nodules    | Diameter (cm)                    |
| 1  | IP 1  | Peru  | Female | 1 404      | 0.14              | 1.12          | 2        | 1                 | 3.5                              |
| 2  | IP 2  | Peru  | Female | 612        | 0.06              | 0.49          | 0.8      | 2                 | 3 - 3.5                          |
| 3  | IP 3  | Peru  | Male   | 1 586      | 0.16              | 1.27          | 2        | 4                 | 3.3 - 3.8 - 2.5 - 2.7            |
| 4  | IP 4  | Peru  | Female | 1 293      | 0.13              | 01.03         | 2        | 2                 | 2 - 4.1                          |
| 5  | IP 5  | Peru  | Female | 661        | 0.07              | 0.53          | 0.8      | 2                 | 2 - 5                            |
| 6  | IP 6  | Peru  | Female | 946        | 0.1               | 0.76          | 1.5      | 1                 | 2.1                              |
| 7  | IP 7  | Peru  | Male   | 442        | 0.04              | 0.35          | 0.8      | 7                 | 7.7 and 5.8                      |
| 8  | IP 8  | Peru  | Male   | 615        | 0.06              | 0.49          | 0.8      | 1                 | 2.3                              |
| 9  | IP 9  | Peru  | Male   | 1 551      | 0.16              | 1.24          | 2        | 2                 | 2.7 and 3.4                      |
| 10 | IP 10 | Peru  | Female | 1 165      | 0.12              | 0.93          | 1.5      | 4                 | 2.6, 3.2, 2.9 and 1.8            |
| 11 | IP 11 | Peru  | Female | 1 150      | 0.12              | 0.92          | 1.5      | 3                 | 2.5, 1.8 and 4.5                 |
| 12 | IP 12 | Peru  | Female | 1 095      | 0.11              | 0.88          | 1.5      | 5                 | 2.7, 2.4, 1.3, 1.9, 2.1, and 1.3 |
| 13 | IP 13 | Peru  | Male   | 664        | 0.07              | 0.53          | 0.8      | 1                 | 4.7                              |
| 14 | II 1  | Inti  | Female | 957        | 0.1               | 0.77          | 1.5      | 2                 | 2.7                              |
| 15 | II 2  | Inti  | Male   | 610        | 0.06              | 0.5           | 0.8      | 1                 | 2.0                              |
| 16 | II 3  | Inti  | Male   | 720        | 0.07              | 0.58          | 1        | 1                 | 1,7                              |
| 17 | II 4  | Inti  | Female | 1 406      | 0.14              | 1.12          | 2        | 1                 | 3.2                              |
| 18 | II 5  | Inti  | Male   | 650        | 0.06              | 0.52          | 0.8      | 4                 | 1.6 - 1.4 - 1.6                  |
| 19 | II 6  | Inti  | Female | 1 350      | 0.14              | 01.08         | 2        | 1                 | 2                                |
| 20 | II 7  | Inti  | Female | 1 645      | 0.16              | 1.32          | 2        | 1                 | 3,1                              |
| 21 | II 8  | Inti  | Female | 1 547      | 0.15              | 1.24          | 2        | 3                 | 2.6 - 3.4 - 3.9                  |
| 22 | II 9  | Inti  | Male   | 1 030      | 0.1               | 0.82          | 1.5      | 1                 | 3.2 x 3.4                        |
| 23 | II 10 | Inti  | Female | 1 885      | 0.2               | 1.51          | 2        | 1                 | 4 x 3.5                          |

Supplementary Table S2. Individual metadata and baseline parameters of healthy group guinea pigs (*Cavia porcellus*). Code (SP : Healthy Peru; II : Healthy Inti)

| ID | Code  | Breed | Sex    | Weight (g) | Euthanasia method    | Clinical findings |                        |
|----|-------|-------|--------|------------|----------------------|-------------------|------------------------|
|    |       |       |        |            |                      | No. of nodules    | Diameter (cm)          |
| 1  | SP 1  | Peru  | Female | 862        | Cervical dislocation | 3                 | 1.1 x 0.7              |
| 2  | SP 2  | Peru  | Male   | 740        | Cervical dislocation | 5                 | 0.7                    |
| 3  | SP 3  | Peru  | Male   | 584        | Cervical dislocation | 4                 | 0.6 - 0.55             |
| 4  | SP 4  | Peru  | Male   | 675        | Cervical dislocation | 4                 | 0.65 - 0.4             |
| 5  | SP 5  | Peru  | Male   | 836        | Cervical dislocation | 4                 | 0.65 - 0.6             |
| 6  | SP 6  | Peru  | Male   | 760        | Cervical dislocation | 5                 | 0.3 - 0.8              |
| 7  | SP 7  | Peru  | Female | 709        | Cervical dislocation | 4                 | 0.65                   |
| 8  | SP 8  | Peru  | Male   | 798        | Cervical dislocation | 5                 | 0.5                    |
| 9  | SP 9  | Peru  | Male   | 735        | Cervical dislocation | 3                 | 0.65                   |
| 10 | SP 10 | Peru  | Male   | 715        | Cervical dislocation | 6                 | 0.5                    |
| 11 | SP 11 | Peru  | Male   | 728        | Cervical dislocation | 4                 | 0.65                   |
| 12 | SI 1  | Inti  | Female | 1051       | Cervical dislocation | 6                 | 1 x 0.6                |
| 13 | SI 2  | Inti  | Male   | 756        | Cervical dislocation | 4                 | 0.35 - 0.75            |
| 14 | SI 3  | Inti  | Male   | 746        | Cervical dislocation | 7                 | 0.35 - 0.55 - 0.7      |
| 15 | SI 4  | Inti  | Male   | 727        | Cervical dislocation | 4                 | 1.05 - 0.6             |
| 16 | SI 5  | Inti  | Male   | 782        | Cervical dislocation | 4                 | 0.8                    |
| 17 | SI 6  | Inti  | Male   | 832        | Cervical dislocation | 3                 | 0.5 - 0.55             |
| 18 | SI 7  | Inti  | Male   | 728        | Cervical dislocation | 7                 | 0.3 - 0.4 - 0.5 - 0.45 |
| 19 | SI 8  | Inti  | Female | 639        | Cervical dislocation | 4                 | 0.85                   |
| 20 | SI 9  | Inti  | Male   | 840        | Cervical dislocation | 4                 | 0.65                   |
| 21 | SI 10 | Inti  | Male   | 594        | Cervical dislocation | 6                 | 0.75                   |
| 22 | SI 11 | Inti  | Male   | 776        | Cervical dislocation | 3                 | 0.7                    |
| 23 | SI 12 | Inti  | Male   | 693        | Cervical dislocation | 4                 | 0.3 - 1.0              |

Supplementary Table S3. Quality control parameters of genomic DNA extracted by fluorometry and spectrophotometry. Code (IP : Infected Peru; II : Infected Inti; SP : Healthy Peru; II : Healthy Inti). Samples marked with an asterisk (\*) were excluded from downstream analyses because they did not yield sequencing data due to low bacterial DNA concentration in the libraries at the time of sequencing.

| <b>ID</b> | <b>Code</b> | <b>QUBIT (ng/μl)</b> | <b>Nanodrop (ng/μl)</b> | <b>A260/A280</b> | <b>A260/A230</b> |
|-----------|-------------|----------------------|-------------------------|------------------|------------------|
| 1         | IP 2        | 24.0                 | 51.7                    | 1.84             | 1.67             |
| 2         | IP 3        | 31.6                 | 30.8                    | 1.88             | 1.67             |
| 3         | IP 4        | 50.5                 | 35                      | 1.89             | 1.95             |
| 4         | IP 6        | 48.1                 | 136                     | 1.87             | 2.07             |
| 5         | IP 7*       | 33.5                 | 31.9                    | 2.04             | 1.86             |
| 6         | IP 8        | 139                  | 582.5                   | 1.93             | 2.36             |
| 7         | IP 9        | 189                  | 426.9                   | 1.76             | 1.27             |
| 8         | IP 10       | 125                  | 198.3                   | 1.89             | 2.25             |
| 9         | IP 11       | 239                  | 673.0                   | 1.94             | 2.34             |
| 10        | IP 12       | 314                  | 517.6                   | 1.93             | 2.36             |
| 11        | IP 13       | 59.7                 | 165.6                   | 1.92             | 2.19             |
| 12        | II 1        | 350                  | 489.2                   | 1.92             | 2.27             |
| 13        | II 2        | 150                  | 455.3                   | 1.97             | 2.36             |
| 14        | II 3        | 1000                 | 2182.6                  | 1.96             | 2.43             |
| 15        | II 4        | 26.4                 | 64.7                    | 1.91             | 2.14             |
| 16        | II 5        | 77.5                 | 170.0                   | 1.92             | 2.34             |
| 17        | II 6        | 267                  | 482.1                   | 1.94             | 2.34             |
| 18        | II 7        | 67.3                 | 268.8                   | 1.94             | 2.30             |
| 19        | II 8        | 55.6                 | 124.7                   | 1.93             | 2.28             |
| 20        | II 9        | 31.0                 | 61.9                    | 1.88             | 2.00             |
| 21        | II 10       | 62.4                 | 122.1                   | 1.90             | 2.29             |
| 22        | SI 1        | 36.1                 | 193.0                   | 1.83             | 1.97             |
| 23        | SI 2        | 477                  | 743.2                   | 1.89             | 2.36             |
| 24        | SI 4*       | 980                  | 1296.0                  | 1.90             | 2.40             |
| 25        | SI 5        | 383                  | 1150.1                  | 1.90             | 2.38             |
| 26        | SI 6*       | 451                  | 1375.6                  | 1.91             | 2.40             |
| 27        | SI 7        | 474                  | 1760.8                  | 1.94             | 2.42             |

|    |        |       |        |      |      |
|----|--------|-------|--------|------|------|
| 28 | SI 8*  | 270   | 770.7  | 1.91 | 2.39 |
| 29 | SI 9   | 600   | 935.1  | 1.89 | 2.39 |
| 30 | SI 10  | 498   | 837.4  | 1.91 | 2.39 |
| 31 | SI 11* | 330   | 591.7  | 1.92 | 2.37 |
| 32 | SI 12* | 242   | 633.0  | 1.93 | 2.37 |
| 33 | SP 1   | 48.9  | 223.2  | 1.93 | 2.09 |
| 34 | SP 2   | 540.0 | 1107.2 | 1.95 | 2.34 |
| 35 | SP 3   | 610.0 | 1192.8 | 1.97 | 2.35 |
| 36 | SP 4*  | 128.0 | 450.9  | 2.01 | 2.29 |
| 37 | SP 5   | 318.0 | 777.9  | 1.97 | 2.33 |
| 38 | SP 6   | 236.0 | 632.6  | 2.00 | 2.31 |
| 39 | SP 7   | 266.0 | 472.4  | 1.96 | 2.28 |
| 40 | SP 8   | 1000  | 1220   | 1.89 | 2.41 |
| 41 | SP 9*  | 770.0 | 1058.9 | 1.92 | 2.38 |
| 42 | SP 10  | 264   | 989.0  | 1.93 | 2.42 |
| 43 | SP 11  | 365   | 763.2  | 1.90 | 2.20 |

Supplementary Table S4. Metadata and analytical classification of all samples. Code (IP : Infected Peru; II : Infected Inti; SP : Healthy Peru; II : Healthy Inti), (+) : positive for the genetic marker, (-) : negative for the genetic marker.

| Sample ID | Group Code | Health Status | Breed | 16S ARN | sodA (Streptococcus spp.) | comB ( <i>S. equi</i> subsp. <i>zooepidemicus</i> ) | seeI ( <i>S. equi</i> subsp. <i>equi</i> ) |
|-----------|------------|---------------|-------|---------|---------------------------|-----------------------------------------------------|--------------------------------------------|
| IP 2      | IP         | Infected      | Peru  | +       | +                         | +                                                   | -                                          |
| IP 3      | IP         | Infected      | Peru  | +       | +                         | +                                                   | -                                          |
| IP 4      | IP         | Infected      | Peru  | +       | +                         | +                                                   | -                                          |
| IP 6      | IP         | Infected      | Peru  | +       | +                         | +                                                   | -                                          |
| IP 7      | IP         | Infected      | Peru  | +       | +                         | +                                                   | -                                          |
| IP 8      | IP         | Infected      | Peru  | +       | -                         | -                                                   | -                                          |
| IP 9      | IP         | Infected      | Peru  | +       | +                         | +                                                   | -                                          |
| IP 10     | IP         | Infected      | Peru  | +       | +                         | +                                                   | -                                          |
| IP 11     | IP         | Infected      | Peru  | +       | +                         | +                                                   | -                                          |
| IP 12     | IP         | Infected      | Peru  | +       | +                         | +                                                   | -                                          |
| IP 13     | IP         | Infected      | Peru  | +       | +                         | +                                                   | -                                          |
| II 1      | II         | Infected      | Inti  | +       | -                         | -                                                   | -                                          |
| II 2      | II         | Infected      | Inti  | +       | +                         | +                                                   | -                                          |

|              |    |          |      |   |   |   |   |
|--------------|----|----------|------|---|---|---|---|
| <b>II 3</b>  | II | Infected | Inti | + | - | - | - |
| <b>II 4</b>  | II | Infected | Inti | + | + | + | - |
| <b>II 5</b>  | II | Infected | Inti | + | + | + | - |
| <b>II 6</b>  | II | Infected | Inti | + | + | + | - |
| <b>II 7</b>  | II | Infected | Inti | + | + | + | - |
| <b>II 8</b>  | II | Infected | Inti | + | + | + | - |
| <b>II 9</b>  | II | Infected | Inti | + | + | + | - |
| <b>II 10</b> | II | Infected | Inti | + | + | + | - |
| <b>SI 1</b>  | SI | Healthy  | Inti | + | - | - | - |
| <b>SI 2</b>  | SI | Healthy  | Inti | + | - | - | - |
| <b>SI 5</b>  | SI | Healthy  | Inti | + | - | - | - |
| <b>SI 7</b>  | SI | Healthy  | Inti | + | - | - | - |
| <b>SI 9</b>  | SI | Healthy  | Inti | + | - | - | - |
| <b>SI 10</b> | SI | Healthy  | Inti | + | - | - | - |
| <b>SP 1</b>  | SP | Healthy  | Peru | + | - | - | - |
| <b>SP 2</b>  | SP | Healthy  | Peru | + | - | - | - |
| <b>SP 3</b>  | SP | Healthy  | Peru | + | - | - | - |
| <b>SP 5</b>  | SP | Healthy  | Peru | + | - | - | - |
| <b>SP 6</b>  | SP | Healthy  | Peru | + | - | - | - |
| <b>SP 7</b>  | SP | Healthy  | Peru | + | - | - | - |
| <b>SP 8</b>  | SP | Healthy  | Peru | + | - | - | - |
| <b>SP 10</b> | SP | Healthy  | Peru | + | - | - | - |
| <b>SP 11</b> | SP | Healthy  | Peru | + | - | - | - |

Supplementary Figure S1. Rarefaction curves of all samples included in the 16S rRNA dataset. Each curve represents an individual sample, showing the relationship between sequencing depth (number of reads) and alpha diversity (observed features). Samples that did not meet the minimum sequencing depth threshold (<10,000 reads) were excluded prior to downstream analyses, before alpha and beta diversity calculations.

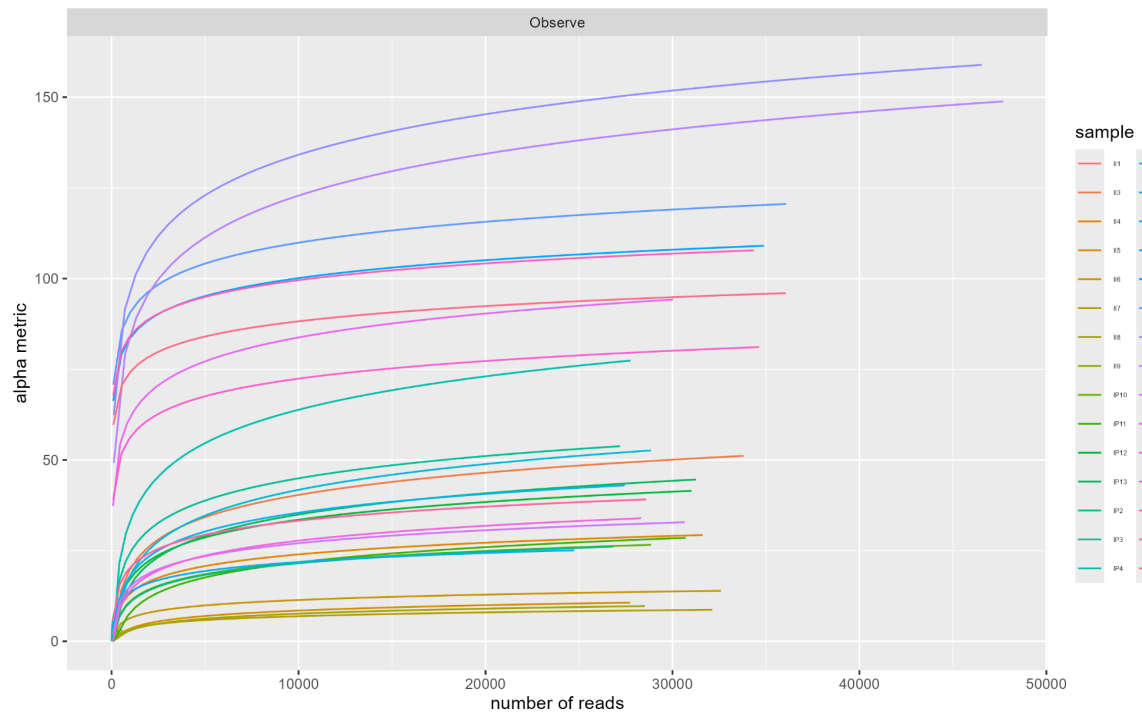

Supplementary Figure S2. Agarose gel electrophoresis of 16S rRNA gene amplification (internal control) using universal primers 27F/1492R in infected guinea pigs. Samples are grouped according to breed and health status, where IP corresponds to infected Peru breed and II corresponds to infected Inti breed. Each lane represents an individual sample identified by its corresponding code. The expected amplicon size is approximately 1,500 bp, confirming the presence of bacterial DNA in all analyzed samples. L indicates the molecular weight marker (100 bp DNA ladder), and C corresponds to the negative control. The absence of amplification in the negative control confirms the specificity of the reaction.

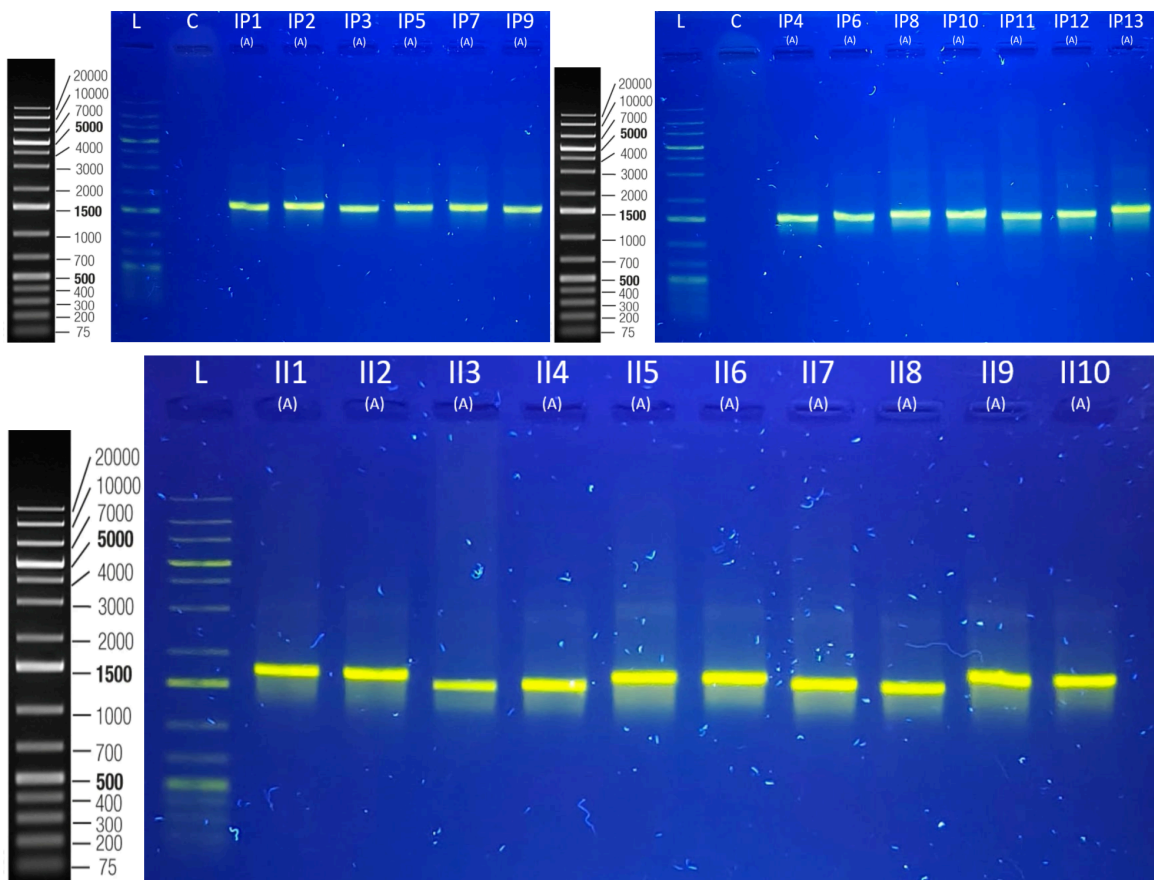

Supplementary Figure S3. Agarose gel electrophoresis of 16S rRNA gene amplification (internal control) using universal primers 27F/1492R in healthy guinea pigs. Samples are grouped according to breed and health status, where SP corresponds to healthy Peru breed and SI corresponds to healthy Inti breed. Each lane represents an individual sample identified by its corresponding code. The expected amplicon size is approximately 1,500 bp, confirming the presence of bacterial DNA in all analyzed samples. L indicates the molecular weight marker (100 bp DNA ladder), and C corresponds to the negative control. The absence of amplification in the negative control confirms the specificity of the reaction.

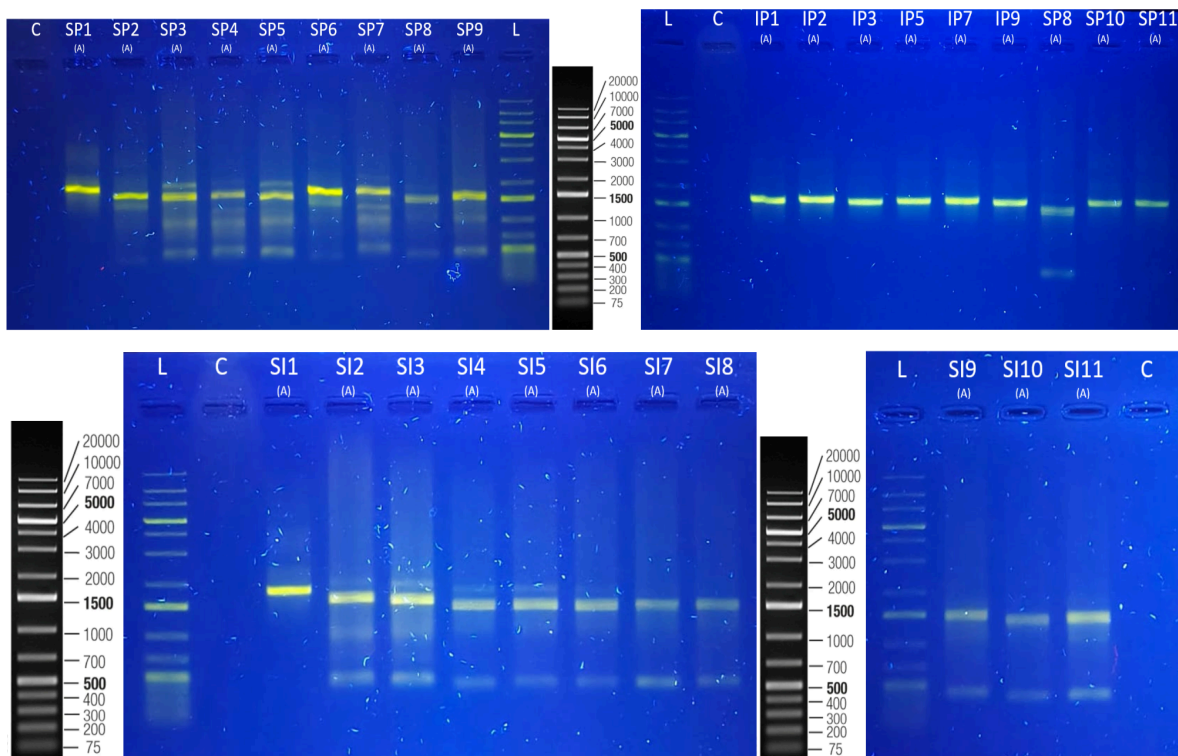

Supplementary Figure S4. Representative anatomical images of cervical lymph nodes in healthy guinea pigs (*Cavia porcellus*) from the Peru breed. Arrows indicate the mandibular cervical lymph nodes, which appear as small, well-defined, non-enlarged structures without signs of abscess or inflammation. These images serve as a reference for normal anatomy to distinguish healthy from diseased lymph nodes.

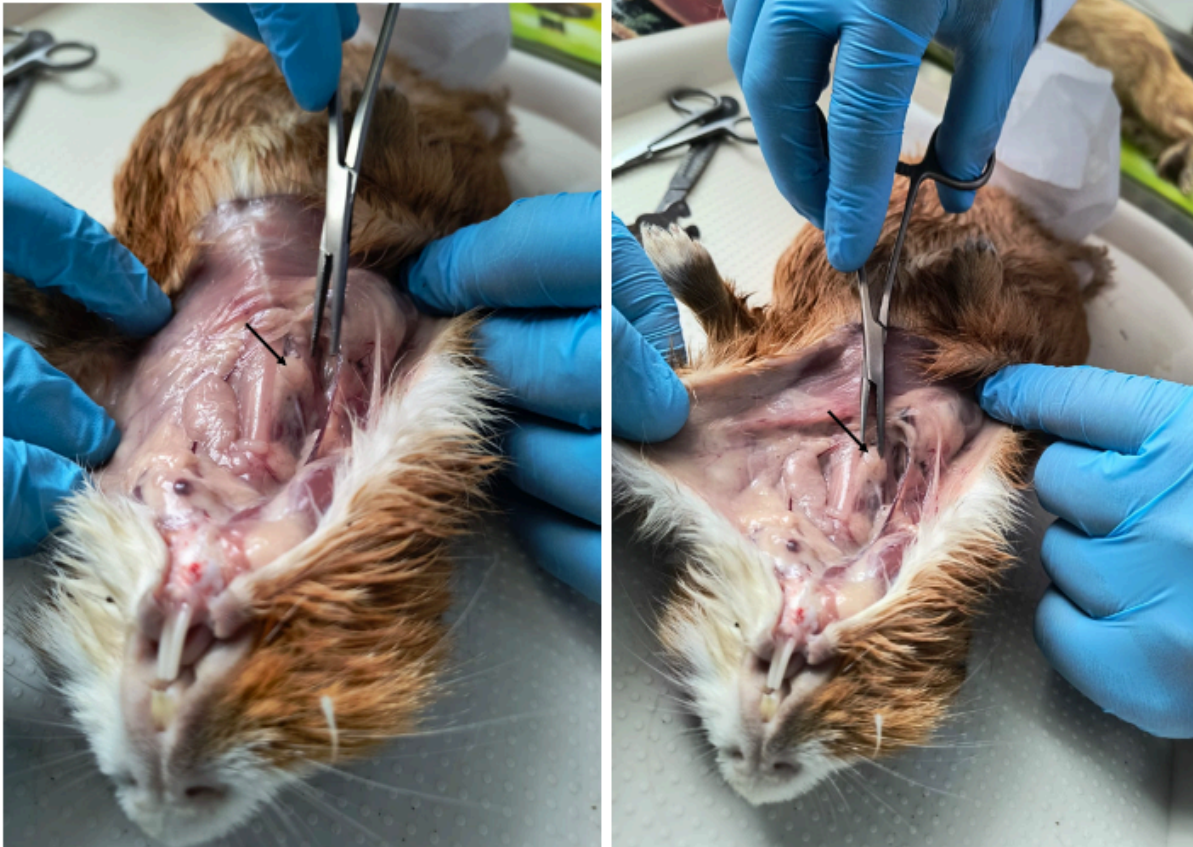

Supplementary Figure S5. Representative gross lesions of cervical lymphadenitis in guinea pigs (*Cavia porcellus*). The image shows enlarged cervical lymph nodes with multiple encapsulated abscesses and irregular morphology, in contrast to the normal anatomy. These macroscopic features support the clinical classification of infected cases.

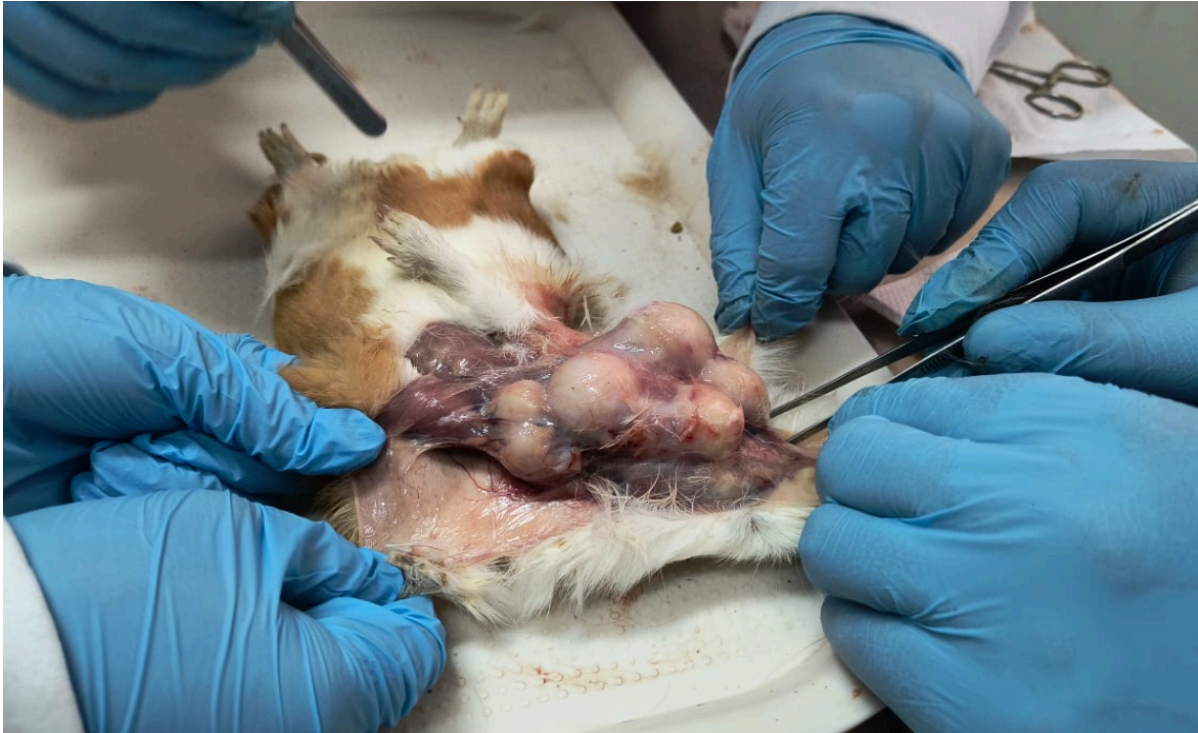

Supplementary Figure S6. Representative isolated cervical lymph nodes from healthy guinea pigs (*Cavia porcellus*). The image shows small, well-defined, pale structures of varying sizes, consistent with normal lymph node morphology.

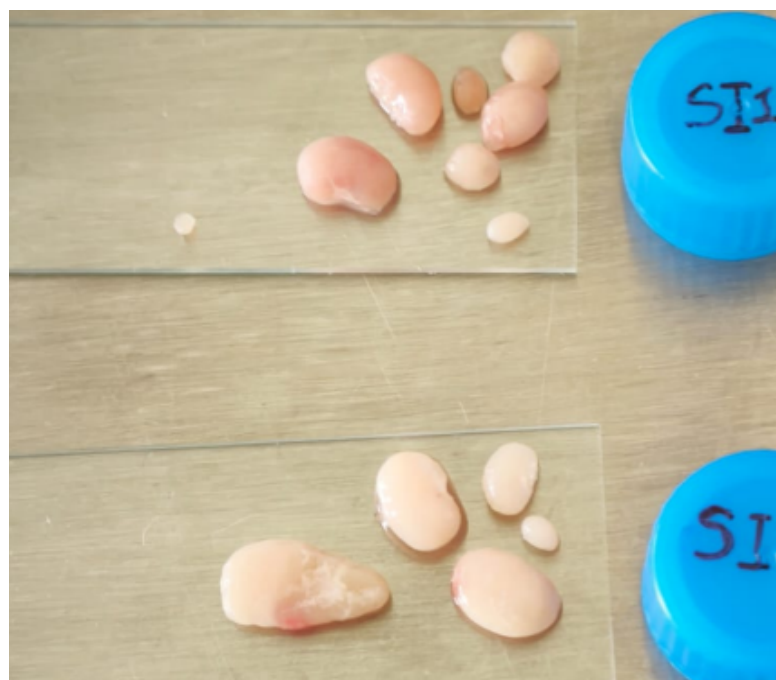

Supplement: Supplementary file 1 [file 88aa9101f1d8a8cac57f8828.pdf]
